# Supplementary material for: Exopolysaccharides from Lactobacillus plantarum NCU116 induce c-Jun dependent Fas/Fasl-mediated apoptosis via TLR2 in mouse intestinal epithelial cancer cells
Source: PubMed Central journal article supplement (PMC5660251; doi:10.1038/s41598-017-14178-2), 2017-10-27

**Exopolysaccharides from *Lactobacillus plantarum* NCU116 induce c-Jun dependent Fas/FasL-mediated apoptosis via TLR2 in mouse intestinal epithelial cancer cells**

Xingtao Zhou<sup>1</sup>, Tao Hong<sup>1</sup>, Qiang Yu<sup>1</sup>, Shaoping Nie<sup>1\*</sup>, Deming Gong<sup>1,2</sup>, Tao Xiong<sup>1</sup>, Mingyong Xie<sup>1\*</sup>

<sup>1</sup>State Key Laboratory of Food Science and Technology, Nanchang University, 235 Nanjing East Road,

Nanchang, Jiangxi 330047, China

<sup>2</sup>New Zealand Institute of Natural Medicine Research, 8 Ha Crescent, Auckland 2041, New Zealand

**Corresponding Authors**

Correspondence to Shaoping Nie or Mingyong Xie.

\*Phone and fax: +86 791-88304452. E-mail: spnie@ncu.edu.cn.

\*Phone and fax: +86 791-83969009. E-mail: myxie@ncu.edu.cn.

**Supplementary Table S1. The primer sequences for qRT-PCR (5'→3').**

|                    |                                 |
|--------------------|---------------------------------|
| Acin1 forward      | 5'- CGAGATGACCCATCCTGAGG-3'     |
| Acin1 reverse      | 5'-GGGGTGAATGTGTGCTGAG-3'       |
| Apaf1 forward      | 5'- AGTGGCAAGGACACAGATGG -3'    |
| Apaf1 reverse      | 5'- GGCTTCCGCAGCTAACACA -3'     |
| APO-2L forward     | 5'-ATGGTGATTTGCATAGTCTCC-3'     |
| APO-2L reverse     | 5'-GCAAGCAGGGTCTGTTCAAGA-3'     |
| Bax forward        | 5'-TGAAGACAGGGCCTTTTTG-3'       |
| Bax reverse        | 5'-AATTCGCCGGA GACTCTCG-3'      |
| Bcl2 forward       | 5'-ATG CCTTTGTGGA ACTATATGGC-3' |
| Bcl2 reverse       | 5'-GGTATGCACCCAGAGTGATGC-3'     |
| beta actin forward | 5'-GGCTGTATTCCCCTCCATCG-3'      |
| beta actin reverse | 5'-CCAGTTGGTAACAATGCCATGT-3'    |
| Cycs forward       | 5'- CCAAATCTCCACGGTCTGTTC -3'   |
| Cycs reverse       | 5'- ATCAGGGTA TCCTCTCCCCAG -3'  |
| c-Jun forward      | 5'- CCTTCTACGACGATGCCCTC -3'    |
| c-Jun reverse      | 5'- GGTTC AAGTCATGCTCTGTTT -3'  |
| c-Fos forward      | 5'-CGGGTTTCAACGCCGACTA -3'      |
| c-Fos reverse      | 5'- TTGGCACTAGAGACGGACAGA -3'   |
| DR3 forward        | 5'-GTGTTGGGATTCGGCTTGGT-3'      |
| DR3 reverse        | 5'-GTCCATGCACTTGTTCGAGGTC-3'    |
| DR5 forward        | 5'-CGGGCAGATCACTACACCC-3'       |
| DR5 reverse        | 5'-TGTTACTGGAACAAAGACAGCC-3'    |
| Fas forward        | 5'-TATCAAGGAGGCCCATTTTGC-3'     |
| Fas reverse        | 5'-TGTTTCCACTTCTAAACCATGCT-3'   |
| Fas1 forward       | 5'-TCCGTGAGTTCACCAACCAAA-3'     |
| Fas1 reverse       | 5'-GGGGGTTCCCTGTAAATGGG-3'      |
| Gas2 forward       | 5'-CAGACATGAAGCTAATTTGCTGC -3'  |
| Gas2 reverse       | 5'-GCAAGGCACCATTAT CCAACT-3'    |
| lamin A forward    | 5'- GGATGCTGAGAACAGGCTACA -3'   |
| lamin A reverse    | 5'- CTCTCGCTGCTTC CCGTTATC -3'  |
| Parp1 forward      | 5'- GGCAGCCTGATGTTGAGGT -3'     |
| Parp1 reverse      | 5'- GCGTACTCCGCTAAAAAGTCAC -3'  |
| Parp2 forward      | 5'- CACAGCTTGGTGACTTGT CT -3'   |
| Parp2 reverse      | 5'- ACTCAGGCTTCAAAGTTTCCTC -3'  |
| Rock1 forward      | 5'-GACTGGGGACAGTTTTGAGAC-3'     |
| Rock1 reverse      | 5'-GGGCATCCAATCCATCCAGC-3';     |
| Tlr1 forward       | 5'- TGAG GGTCTGATAATGTCCTAC -3' |
| Tlr1 reverse       | 5'- AGAGGTCCAAATGCTTGAGGC -3'   |
| Tlr2 forward       | 5'- GCAAACGCT GTTCTGCTCAG -3'   |
| Tlr2 reverse       | 5'-AGGCGTCTCCCTCTATTGTATT-3'    |
| Tlr3 forward       | 5'-GTGAGATACAACGTAGCTGACTG-3'   |

|                     |                               |
|---------------------|-------------------------------|
| Tlr3 reverse        | 5'-TCCTGCATCCAAGATAGCAAGT-3'  |
| Tlr4 forward        | 5'-ATGGCATGGCTTACACCACC-3'    |
| Tlr4 reverse        | 5'-GAGGCCAATTTTGTCTCCACA-3'   |
| Tlr5 forward        | 5'-GCAGGATCATGGCATGTCAAC-3'   |
| Tlr5 reverse        | 5'- ATCTGGGTGAGGTTACAGCCT-3'  |
| Tlr6 forward        | 5'-TGAGCCAAGACAGAAAACCCA -3'  |
| Tlr6 reverse        | 5'- GGGACATGAGTAAGGTTCTGT-3'  |
| TNF-R1 forward      | 5'-CCGGGAGAAGAGGGA TAGCTT-3'  |
| TNF-R1 reverse      | 5'-TCGGACAGTCACTACCAAGT-3'    |
| TNF-R2 forward      | 5'-ACACCCTA CAAACCGGAACC-3'   |
| TNF-R2 reverse      | 5'-AGCCTTCCTGTCATAGTATTCCT-3' |
| Human c-Jun forward | 5'- AACAGGTGGCACAGCTTAAAC -3' |
| Human c-Jun reverse | 5'- CAACTGCTGCGTTAGCATGAG -3' |
| Human Fas forward   | 5'- TCTGGTTCTTACGTCTGTTGC -3' |
| Human Fas reverse   | 5'- CTGTGCAGTCCCTAGCTTTCC -3' |
| Human Tlr2 forward  | 5'-ATCCTCCAATCAGGCTTCTCT-3'   |
| Human Tlr2 reverse  | 5'-GGACAGGTCAAGGCTTTTTACA-3'  |

**Supplementary Table S2. The primer sequences for TLRs shRNA (5'→3').**

|                |                                                            |
|----------------|------------------------------------------------------------|
| TLR2 forward 1 | CCGGGATAATCACCTATCTAGTTTACTCGAGTAACTAGATAGGTGATTATCTTTTTG  |
| TLR2 reverse 1 | AATTCAAAAAGATAATCACCTATCTAGTTTACTCGAGTAACTAGATAGGTGATTATC  |
| TLR2 forward 2 | CCGGGCAGTCTTGAACATTTGGATTCTCGAGAATCCAAATGTTCAAGACTGCTTTTTG |
| TLR2 reverse 2 | AATTCAAAAAGCAGTCTTGAACATTTGGATTCTCGAGAATCCAAATGTTCAAGACTGC |
| TLR1 forward 1 | CCGGCCGTCCCAAGTTAGCCATTTCTCGAGAAATGGGCTAACTGGGACGGTTTTTG   |
| TLR1 reverse 1 | AATTCAAAAACCGTCCCAAGTTAGCCATTTCTCGAGAAATGGGCTAACTGGGACGG   |
| TLR1 forward 2 | CCGGGCCTTCAGGATGTTCAATTATCTCGAGATAATTGAACATCCTGAAGGCTTTTTG |
| TLR1 reverse 2 | AATTCAAAAAGCCTTCAGGATGTTCAATTATCTCGAGATAATTGAACATCCTGAAGGC |
| TLR6 forward 1 | CCGGCCGGTGGAGTACCTCAATATTCTCGAGAATATTGAGGTACTCCACCGGTTTTG  |
| TLR6 reverse 1 | AATTCAAAAACCGGTGGAGTACCTCAATATTCTCGAGAATATTGAGGTACTCCACCGG |
| TLR6 forward 2 | CCGGAGGCGCTATACTCGGTGTTTGCTCGAGCAAACACCGAGTATAGCGCCTTTTTG  |
| TLR6 reverse 2 | AATTCAAAAAGGCGCTATACTCGGTGTTTGCTCGAGCAAACACCGAGTATAGCGCCT  |

**Supplementary Fig. S1 shRNA recombinant plasmids were verified by digesting with restriction enzymes (EcoRI, NcoI).** Lane 1, 2, 3: TLR2 shRNA1; Lane 4, 5, 6, 7: TLR2 shRNA2; Lane 8, 9, 10: TLR1 shRNA1; Lane 11, 12, 13: TLR1 shRNA2; Lane 14, 15, 16, 17: TLR6 shRNA1; Lane 18, 19, 20: TLR6 shRNA2; Lane M1, M2: 1kb ladder marker from Takara Bio (Dalian, China). A correct shRNA recombinant plasmid should have three fragments about 5kb, 2kb and 1kb.

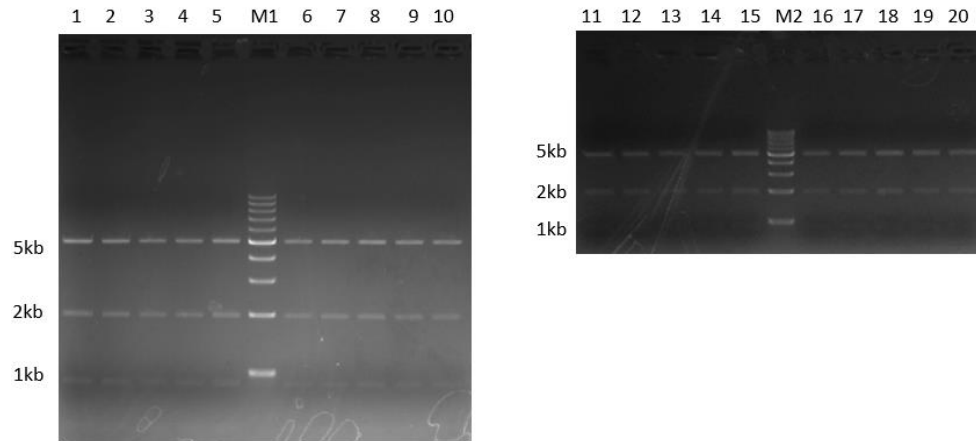

**Supplementary Fig. S2 shRNA recombinant plasmids were verified by DNA sequencing.** The insertions sequence was listed as follows and target sequence was indexed red line in the figure.

TLR2 shRNA: CCGGGATAATCACCTATCTAGTTTACTCGAGTAAACTAGATAGGTGATTATCTTTTTG;

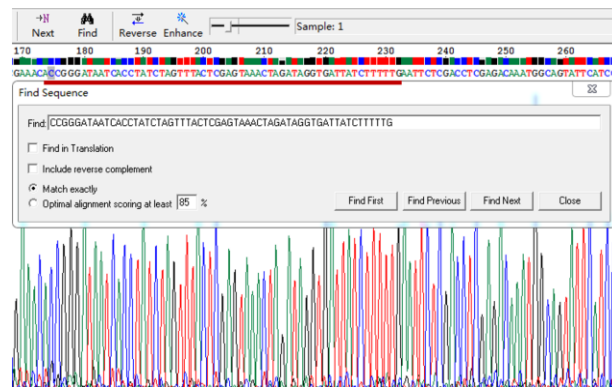

TLR2 shRNA: CCGGGCAGTCTTGAACATTTGGATTCTCGAGAATCCAAATGTTCAAGACTGCTTTTTG

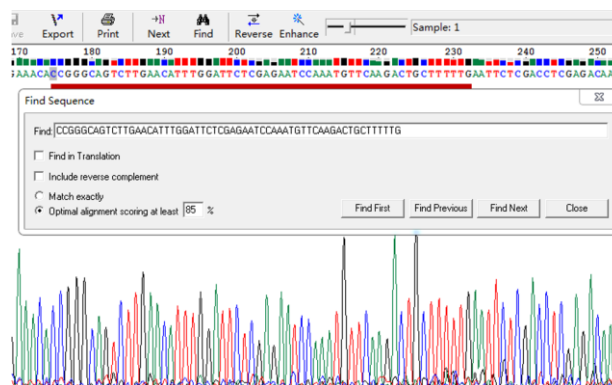

TLR1 shRNA: CCGGCCGTCCCAAGTTAGCCATTTCTCGAGAAATGGGCTAACTGGGACGGTTTTTG;

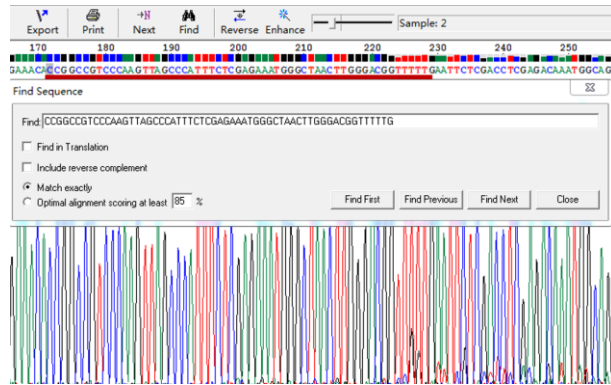

TLR6 shRNA: CCGGAGGCGCTATACTCGGTGTTTGCTCGAGCAAACACCGAGTATAGCGCCTTTTTTG.

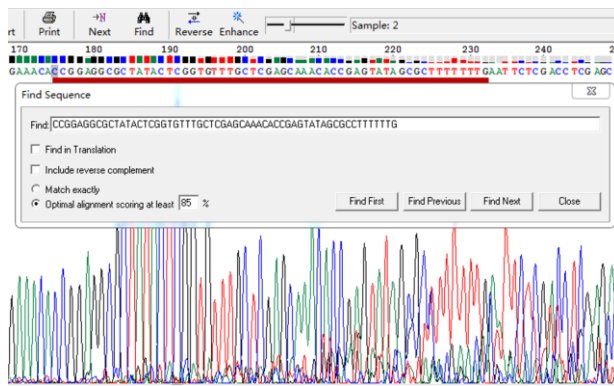

TLR6 shRNA: CCGGCCGGTGGAGTACCTCAATATTCTCGAGAATATTGAGGTACTCCACCGTTTTTG

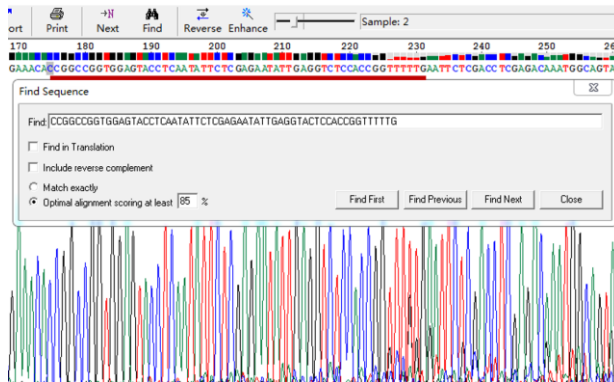

**Supplementary Fig. S3 shRNA knockdown of TLR2, TLR1 and TLR6 in CT26 verified by RT-qPCR.**

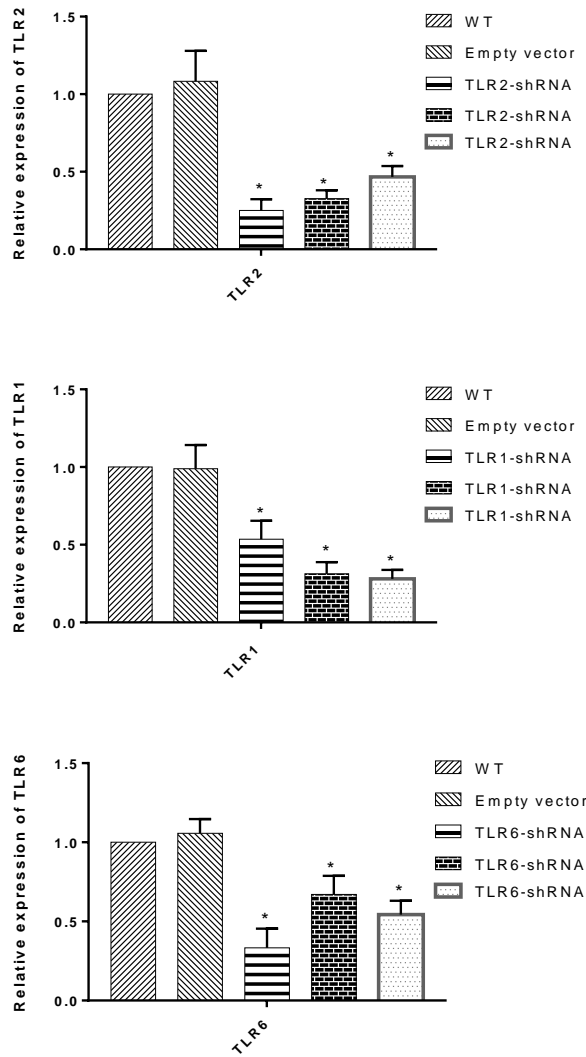

**Supplementary Fig. S4 shRNA knockdown of TLR2 in CT26 verified by Western blot;**

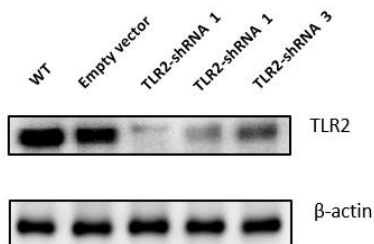

Western-Blots data for Figure 3 to 7

Figure 3C

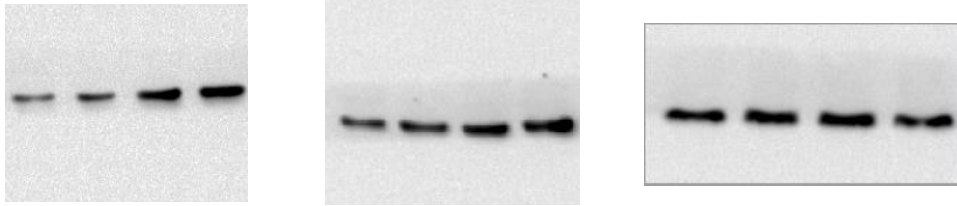

Figure 4A

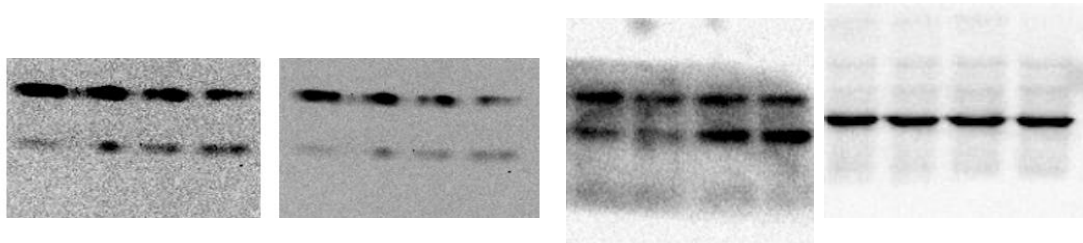

Figure 5B

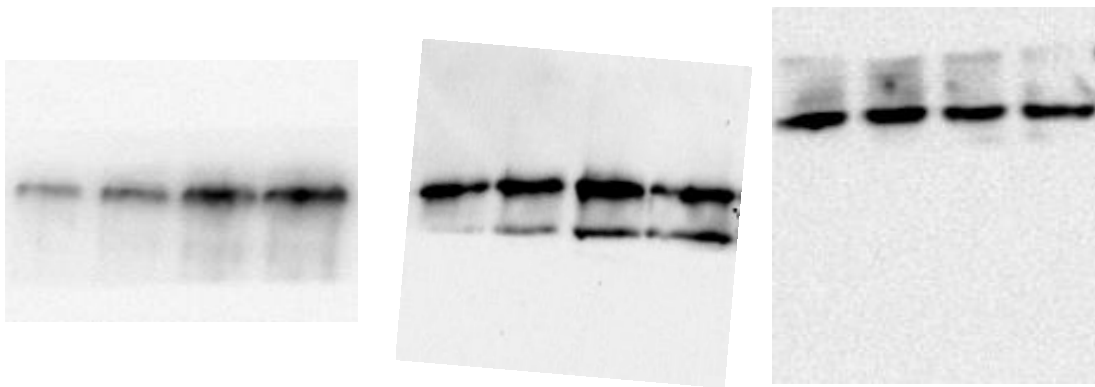

Figure 6B

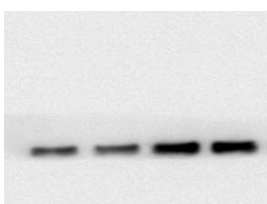

Figure 6C

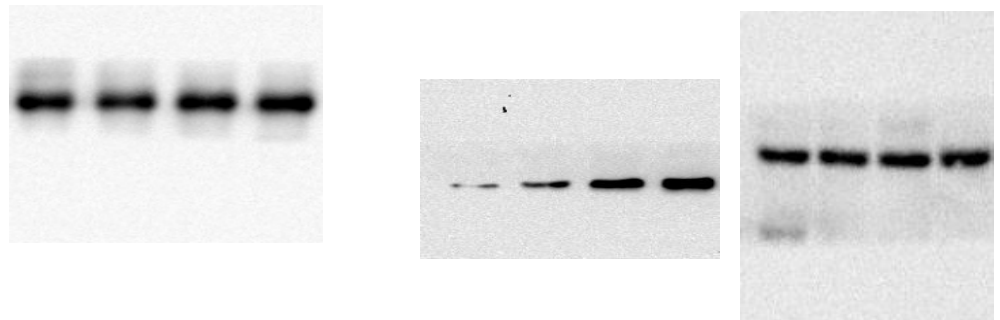

Figure 7B

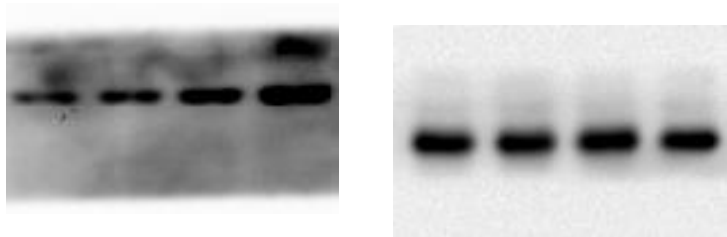

Supplement: 41598_2017_14178_MOESM1_ESM.pdf [file 41598_2017_14178_MOESM1_ESM.pdf]
